# Supplementary material
Source: Copernicus journal article supplement (doi:10.5194/bg-23-4287-2026)
Supplement: Supplementary file 1 [file bg-23-4287-2026-supplement.pdf]

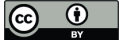

*Supplement of*

## **Unlocking the potential of pollarded oaks: a 375-year hydroclimate reconstruction from northcentral Spain**

**Alba Sanmiguel-Vallelado et al.**

*Correspondence to:* Alba Sanmiguel-Vallelado (alba.sanmiguel@uva.es)

The copyright of individual parts of the supplement might differ from the article licence.

## Supplement

Table S1: Sensitivity of the LWI chronology–precipitation relationship to detrending method. Detrending variants were compared against the selected method: a cubic smoothing spline with a 50% frequency-response cutoff at two-thirds of the individual series length, applied without power transformation (non-PT). Fixed-50: cubic smoothing spline with a fixed 50-year frequency cutoff applied regardless of series length. ADC: Age-Dependent Changing Spline, whose rigidity decreases as a function of the number of rings in each series. PT: power transformation applied to raw series prior to detrending to stabilize variance. non-PT: no power transformation applied. Values in the second column are Pearson's correlations between each alternative LWI chronology and the selected LWI chronology, reported for the instrumental period (1902–2022) and the full chronology length (1649–2023), respectively. Remaining columns show Pearson's correlations between each LWI chronology and November–June precipitation from the FIC (1952–2020) and CRU (1952–2020 and 1902–2022) gridded datasets. None of the pairwise differences in climate correlations were statistically significant (Fisher z-test,  $p > 0.05$  in all cases).

| Detrending method            | Selected chronology<br>(1902–2022 / 1649–2023) | FIC (1952–2020) | CRU (1952–2020) | CRU (1902–2020) |
|------------------------------|------------------------------------------------|-----------------|-----------------|-----------------|
| Selected: 2/3 spline, non-PT | 1.000 / 1.000                                  | 0.834           | 0.832           | 0.760           |
| Fixed-50, PT                 | 0.958 / 0.927                                  | 0.820           | 0.794           | 0.746           |
| Fixed-50, non-PT             | 0.957 / 0.925                                  | 0.810           | 0.790           | 0.748           |
| ADC, PT                      | 0.928 / 0.834                                  | 0.803           | 0.799           | 0.733           |
| ADC, non-PT                  | 0.930 / 0.829                                  | 0.815           | 0.777           | 0.747           |

Table S2: Running EPS values for the RWI series. Bold font indicates periods with stable EPS values  $> 0.85$ . Abbreviations: Start year: first year in the window; End year: last year in the window; N cores: number of cores; N trees: number of trees; N corr: total number of correlations, calculated as the sum of within-tree and between-tree correlations; Rbar: mean correlation among different cores; EPS: expressed population signal; SNR: signal-to-noise ratio.

| Start year  | End year    | N cores   | N trees   | N corr      | Rbar         | EPS          | SNR           |
|-------------|-------------|-----------|-----------|-------------|--------------|--------------|---------------|
| 1559        | 1588        | 12        | 12        | 15          | 0.197        | 0.596        | 1.475         |
| 1574        | 1603        | 17        | 17        | 36          | 0.207        | 0.702        | 2.353         |
| 1589        | 1618        | 22        | 22        | 66          | 0.212        | 0.763        | 3.227         |
| 1604        | 1633        | 26        | 26        | 136         | 0.131        | 0.719        | 2.560         |
| 1619        | 1648        | 30        | 30        | 231         | 0.210        | 0.854        | 5.846         |
| 1634        | 1663        | 34        | 34        | 325         | 0.161        | 0.833        | 5.001         |
| <b>1649</b> | <b>1678</b> | <b>39</b> | <b>39</b> | <b>435</b>  | <b>0.175</b> | <b>0.864</b> | <b>6.348</b>  |
| <b>1664</b> | <b>1693</b> | <b>43</b> | <b>43</b> | <b>561</b>  | <b>0.277</b> | <b>0.929</b> | <b>13.034</b> |
| <b>1679</b> | <b>1708</b> | <b>45</b> | <b>45</b> | <b>741</b>  | <b>0.264</b> | <b>0.933</b> | <b>13.955</b> |
| <b>1694</b> | <b>1723</b> | <b>45</b> | <b>45</b> | <b>946</b>  | <b>0.209</b> | <b>0.921</b> | <b>11.594</b> |
| <b>1709</b> | <b>1738</b> | <b>46</b> | <b>46</b> | <b>990</b>  | <b>0.216</b> | <b>0.925</b> | <b>12.388</b> |
| <b>1724</b> | <b>1753</b> | <b>51</b> | <b>51</b> | <b>990</b>  | <b>0.240</b> | <b>0.934</b> | <b>14.219</b> |
| <b>1739</b> | <b>1768</b> | <b>54</b> | <b>54</b> | <b>1035</b> | <b>0.216</b> | <b>0.927</b> | <b>12.644</b> |
| <b>1754</b> | <b>1783</b> | <b>59</b> | <b>59</b> | <b>1275</b> | <b>0.245</b> | <b>0.943</b> | <b>16.552</b> |
| <b>1769</b> | <b>1798</b> | <b>64</b> | <b>64</b> | <b>1431</b> | <b>0.298</b> | <b>0.958</b> | <b>22.900</b> |
| <b>1784</b> | <b>1813</b> | <b>70</b> | <b>70</b> | <b>1711</b> | <b>0.233</b> | <b>0.947</b> | <b>17.907</b> |
| <b>1799</b> | <b>1828</b> | <b>72</b> | <b>72</b> | <b>2016</b> | <b>0.238</b> | <b>0.952</b> | <b>20.040</b> |
| <b>1814</b> | <b>1843</b> | <b>76</b> | <b>76</b> | <b>2346</b> | <b>0.194</b> | <b>0.943</b> | <b>16.566</b> |
| <b>1829</b> | <b>1858</b> | <b>80</b> | <b>80</b> | <b>2556</b> | <b>0.190</b> | <b>0.944</b> | <b>16.936</b> |

|      |      |     |     |      |       |       |        |
|------|------|-----|-----|------|-------|-------|--------|
| 1844 | 1873 | 86  | 86  | 2775 | 0.222 | 0.955 | 21.382 |
| 1859 | 1888 | 87  | 87  | 3081 | 0.183 | 0.946 | 17.646 |
| 1874 | 1903 | 89  | 89  | 3655 | 0.196 | 0.954 | 20.958 |
| 1889 | 1918 | 91  | 91  | 3828 | 0.194 | 0.955 | 21.127 |
| 1904 | 1933 | 93  | 93  | 3916 | 0.140 | 0.935 | 14.485 |
| 1919 | 1948 | 96  | 96  | 4095 | 0.189 | 0.955 | 21.146 |
| 1934 | 1963 | 100 | 100 | 4278 | 0.292 | 0.975 | 38.379 |
| 1949 | 1978 | 102 | 102 | 4560 | 0.333 | 0.980 | 47.884 |
| 1964 | 1993 | 102 | 102 | 5050 | 0.380 | 0.984 | 61.775 |
| 1979 | 2008 | 102 | 102 | 5151 | 0.426 | 0.987 | 75.668 |
| 1994 | 2023 | 102 | 102 | 45   | 0.372 | 0.856 | 5.935  |

Table S3: Running EPS values for the EW1 series. **Bold font: periods showing a stabilized EPS > 0.85.** Abbreviations: Start year: the first year in the window; End year: the last year in the window; N cores: the number of cores; N trees: the number of trees; N corr: total number of correlations as number of within-tree + between-tree correlations computed; Rbar: mean of all the correlations between different cores; EPS: Expressed Population Signal; SNR: Signal-to-Noise Ratio.

20

| Start year  | End year    | N cores   | N trees   | N corr      | Rbar         | EPS          | SNR          |
|-------------|-------------|-----------|-----------|-------------|--------------|--------------|--------------|
| 1559        | 1588        | 12        | 12        | 15          | 0.015        | 0.085        | 0.093        |
| 1574        | 1603        | 17        | 17        | 36          | 0.073        | 0.415        | 0.709        |
| 1589        | 1618        | 22        | 22        | 66          | 0.116        | 0.611        | 1.572        |
| 1604        | 1633        | 26        | 26        | 136         | 0.030        | 0.347        | 0.532        |
| 1619        | 1648        | 30        | 30        | 231         | 0.071        | 0.626        | 1.672        |
| 1634        | 1663        | 34        | 34        | 325         | 0.049        | 0.572        | 1.338        |
| 1649        | 1678        | 39        | 39        | 435         | 0.076        | 0.712        | 2.473        |
| 1664        | 1693        | 43        | 43        | 561         | 0.145        | 0.852        | 5.761        |
| 1679        | 1708        | 45        | 45        | 741         | 0.150        | 0.873        | 6.895        |
| 1694        | 1723        | 45        | 45        | 946         | 0.099        | 0.829        | 4.860        |
| 1709        | 1738        | 46        | 46        | 990         | 0.073        | 0.779        | 3.534        |
| 1724        | 1753        | 51        | 51        | 990         | 0.076        | 0.786        | 3.676        |
| 1739        | 1768        | 54        | 54        | 1035        | 0.086        | 0.812        | 4.306        |
| 1754        | 1783        | 59        | 59        | 1275        | 0.079        | 0.813        | 4.358        |
| <b>1769</b> | <b>1798</b> | <b>64</b> | <b>64</b> | <b>1431</b> | <b>0.152</b> | <b>0.906</b> | <b>9.664</b> |
| 1784        | 1813        | 70        | 70        | 1711        | 0.107        | 0.876        | 7.037        |
| 1799        | 1828        | 72        | 72        | 2016        | 0.097        | 0.873        | 6.849        |
| 1814        | 1843        | 76        | 76        | 2346        | 0.089        | 0.871        | 6.760        |
| 1829        | 1858        | 80        | 80        | 2556        | 0.093        | 0.881        | 7.422        |
| 1844        | 1873        | 86        | 86        | 2775        | 0.102        | 0.895        | 8.486        |
| 1859        | 1888        | 87        | 87        | 3081        | 0.100        | 0.898        | 8.819        |
| 1874        | 1903        | 89        | 89        | 3655        | 0.110        | 0.914        | 10.647       |
| 1889        | 1918        | 91        | 91        | 3828        | 0.105        | 0.911        | 10.277       |
| 1904        | 1933        | 93        | 93        | 3916        | 0.049        | 0.822        | 4.609        |
| 1919        | 1948        | 96        | 96        | 4095        | 0.066        | 0.865        | 6.399        |
| 1934        | 1963        | 100       | 100       | 4278        | 0.107        | 0.917        | 11.088       |
| 1949        | 1978        | 102       | 102       | 4560        | 0.140        | 0.940        | 15.641       |

|      |      |     |     |      |       |       |        |
|------|------|-----|-----|------|-------|-------|--------|
| 1964 | 1993 | 102 | 102 | 5050 | 0.139 | 0.942 | 16.267 |
| 1979 | 2008 | 102 | 102 | 5151 | 0.183 | 0.958 | 22.843 |
| 1994 | 2023 | 102 | 102 | 45   | 0.179 | 0.686 | 2.183  |

25

**Table S4: Running EPS values for the LWI series. Bold font: periods showing a stabilized EPS > 0.85. Abbreviations: Start year: the first year in the window; End year: the last year in the window; N cores: the number of cores; N trees: the number of trees; N corr: total number of correlations as number of within-tree + between-tree correlations computed; Rbar: mean of all the correlations between different cores; EPS: Expressed Population Signal; SNR: Signal-to-Noise Ratio.**

| Start year  | End year    | N cores   | N trees   | N corr     | Rbar         | EPS          | SNR           |
|-------------|-------------|-----------|-----------|------------|--------------|--------------|---------------|
| 1559        | 1588        | 12        | 12        | 15         | 0.182        | 0.571        | 1.333         |
| 1574        | 1603        | 17        | 17        | 36         | 0.202        | 0.695        | 2.279         |
| 1589        | 1618        | 21        | 21        | 66         | 0.182        | 0.728        | 2.672         |
| 1604        | 1633        | 25        | 25        | 136        | 0.158        | 0.761        | 3.193         |
| 1619        | 1648        | 29        | 29        | 210        | 0.198        | 0.838        | 5.184         |
| 1634        | 1663        | 33        | 33        | 300        | 0.177        | 0.843        | 5.364         |
| <b>1649</b> | <b>1678</b> | <b>38</b> | <b>38</b> | <b>406</b> | <b>0.213</b> | <b>0.887</b> | <b>7.843</b>  |
| <b>1664</b> | <b>1693</b> | <b>42</b> | <b>42</b> | <b>528</b> | <b>0.295</b> | <b>0.933</b> | <b>13.838</b> |
| <b>1679</b> | <b>1708</b> | <b>44</b> | <b>44</b> | <b>703</b> | <b>0.249</b> | <b>0.926</b> | <b>12.598</b> |
| <b>1694</b> | <b>1723</b> | <b>45</b> | <b>45</b> | <b>903</b> | <b>0.196</b> | <b>0.913</b> | <b>10.506</b> |
| 1709        | 1738        | 46        | 46        | 946        | 0.221        | 0.926        | 12.491        |
| 1724        | 1753        | 51        | 51        | 990        | 0.260        | 0.941        | 15.847        |
| 1739        | 1768        | 54        | 54        | 1035       | 0.228        | 0.931        | 13.598        |
| 1754        | 1783        | 59        | 59        | 1275       | 0.237        | 0.941        | 15.821        |
| 1769        | 1798        | 64        | 64        | 1431       | 0.237        | 0.944        | 16.739        |
| 1784        | 1813        | 70        | 70        | 1711       | 0.226        | 0.945        | 17.198        |
| 1799        | 1828        | 72        | 72        | 2016       | 0.234        | 0.951        | 19.503        |
| 1814        | 1843        | 76        | 76        | 2346       | 0.178        | 0.937        | 14.967        |
| 1829        | 1858        | 80        | 80        | 2556       | 0.168        | 0.936        | 14.541        |
| 1844        | 1873        | 86        | 86        | 2775       | 0.200        | 0.949        | 18.726        |
| 1859        | 1888        | 87        | 87        | 3081       | 0.150        | 0.933        | 13.956        |
| 1874        | 1903        | 89        | 89        | 3655       | 0.159        | 0.942        | 16.278        |
| 1889        | 1918        | 91        | 91        | 3828       | 0.167        | 0.947        | 17.702        |
| 1904        | 1933        | 93        | 93        | 3916       | 0.143        | 0.937        | 14.907        |
| 1919        | 1948        | 96        | 96        | 4095       | 0.196        | 0.957        | 22.148        |
| 1934        | 1963        | 100       | 100       | 4278       | 0.290        | 0.974        | 37.942        |
| 1949        | 1978        | 102       | 102       | 4560       | 0.306        | 0.977        | 42.231        |
| 1964        | 1993        | 102       | 102       | 5050       | 0.341        | 0.981        | 52.229        |
| 1979        | 2008        | 102       | 102       | 5151       | 0.387        | 0.985        | 64.357        |
| 1994        | 2023        | 102       | 102       | 45         | 0.452        | 0.892        | 8.236         |

30 **Table S5: Effects of pollarding on precipitation signals: results from the RWI linear mixed-effects model. Fixed effects: November–June precipitation (CRU data, 1902–2022) and time since pollarding. Random effects: the individual sampled trees (N = 93);  $\sigma^2 = 0.06$ . Observations = 6708. Marginal  $R^2 = 0.245$ ; Conditional  $R^2 = 0.249$ . CI: confidence interval.**

| Predictors         | Estimates | CI                  | p-value |
|--------------------|-----------|---------------------|---------|
| (Intercept)        | 0.79059   | 0.66120 – 0.91997   | <0.001  |
| pp rwi             | 0.00088   | 0.00062 – 0.00114   | <0.001  |
| time [1]           | -0.09783  | -0.28727 – 0.09161  | 0.311   |
| time [2]           | -0.12816  | -0.31943 – 0.06310  | 0.189   |
| time [3]           | -0.24495  | -0.43954 – -0.05037 | 0.014   |
| time [4]           | -0.36922  | -0.56703 – -0.17141 | <0.001  |
| time [5]           | -0.35584  | -0.55709 – -0.15460 | 0.001   |
| time [6]           | -0.14759  | -0.33529 – 0.04010  | 0.123   |
| time [7]           | -0.30347  | -0.51550 – -0.09143 | 0.005   |
| time [8]           | -0.4105   | -0.61363 – -0.20737 | <0.001  |
| time [9]           | -0.27058  | -0.46686 – -0.07430 | 0.007   |
| time [10]          | -0.28611  | -0.41948 – -0.15273 | <0.001  |
| pp rwi × time [1]  | -0.00034  | -0.00075 – 0.00008  | 0.112   |
| pp rwi × time [2]  | -0.00061  | -0.00103 – -0.00018 | 0.005   |
| pp rwi × time [3]  | -0.00028  | -0.00071 – 0.00014  | 0.194   |
| pp rwi × time [4]  | 0.00003   | -0.00038 – 0.00045  | 0.881   |
| pp rwi × time [5]  | 0.00014   | -0.00028 – 0.00056  | 0.511   |
| pp rwi × time [6]  | -0.00027  | -0.00068 – 0.00013  | 0.187   |
| pp rwi × time [7]  | 0.0002    | -0.00025 – 0.00066  | 0.383   |
| pp rwi × time [8]  | 0.00053   | 0.00009 – 0.00097   | 0.018   |
| pp rwi × time [9]  | 0.00023   | -0.00021 – 0.00066  | 0.303   |
| pp rwi × time [10] | 0.00032   | 0.00005 – 0.00059   | 0.021   |

35 **Table S6: Influence of pollarding on precipitation signals: results from the EWI linear mixed-effects model. Fixed effects: November–February precipitation (CRU data, 1902–2022) and time since pollarding. Random effects: the individual sampled trees (N = 93);  $\sigma^2 = 0.05$ . Observations = 6726. Marginal  $R^2 = 0.061$ ; Conditional  $R^2 = 0.062$ . CI: confidence interval.**

| Predictors        | Estimates | CI                 | p-value |
|-------------------|-----------|--------------------|---------|
| (Intercept)       | 0.83659   | 0.75025 – 0.92294  | <0.001  |
| pp ewi            | 0.00074   | 0.00039 – 0.00109  | <0.001  |
| time [1]          | 0.03264   | -0.09473 – 0.16001 | 0.615   |
| time [2]          | 0.03777   | -0.08248 – 0.15802 | 0.538   |
| time [3]          | -0.01363  | -0.14047 – 0.11321 | 0.833   |
| time [4]          | -0.12094  | -0.25491 – 0.01304 | 0.077   |
| time [5]          | -0.08716  | -0.22017 – 0.04585 | 0.199   |
| time [6]          | 0.05555   | -0.07039 – 0.18148 | 0.387   |
| time [7]          | 0.03131   | -0.10284 – 0.16546 | 0.647   |
| time [8]          | 0.00879   | -0.12193 – 0.13951 | 0.895   |
| time [9]          | 0.03283   | -0.09596 – 0.16162 | 0.617   |
| time [10]         | 0.04401   | -0.04491 – 0.13293 | 0.332   |
| pp ewi × time [1] | 0.00007   | -0.00048 – 0.00063 | 0.791   |

|                    |          |                    |       |
|--------------------|----------|--------------------|-------|
| pp ewi × time [2]  | -0.00035 | -0.00088 – 0.00017 | 0.187 |
| pp ewi × time [3]  | -0.00028 | -0.00083 – 0.00027 | 0.318 |
| pp ewi × time [4]  | 0.000003 | -0.00055 – 0.00055 | 0.991 |
| pp ewi × time [5]  | 0.00006  | -0.00048 – 0.00061 | 0.821 |
| pp ewi × time [6]  | -0.00042 | -0.00095 – 0.00011 | 0.123 |
| pp ewi × time [7]  | -0.00023 | -0.00080 – 0.00034 | 0.422 |
| pp ewi × time [8]  | -0.00008 | -0.00064 – 0.00047 | 0.775 |
| pp ewi × time [9]  | -0.00009 | -0.00066 – 0.00048 | 0.76  |
| pp ewi × time [10] | -0.0001  | -0.00047 – 0.00026 | 0.569 |

40 **Table S7: Influence of pollarding on precipitation signals: results from the LWI linear mixed-effects model. Fixed effects: November–June precipitation (CRU data, 1902–2022) and time since pollarding. Random effects: the individual sampled trees (N = 93);  $\sigma^2 = 0.22$ . Observations = 6726. Marginal  $R^2 = 0.284$ ; Conditional  $R^2 = 0.286$ . CI: confidence interval.**

| Predictors         | Estimates | CI                  | p-value |
|--------------------|-----------|---------------------|---------|
| (Intercept)        | 0.83852   | 0.59589 – 1.08114   | <0.001  |
| pp lwi             | 0.00158   | 0.00109 – 0.00207   | <0.001  |
| time [1]           | -0.40885  | -0.76754 – -0.05015 | 0.025   |
| time [2]           | -0.57884  | -0.94100 – -0.21669 | 0.002   |
| time [3]           | -0.54786  | -0.91571 – -0.18001 | 0.004   |
| time [4]           | -0.78633  | -1.15985 – -0.41281 | <0.001  |
| time [5]           | -0.77853  | -1.15880 – -0.39826 | <0.001  |
| time [6]           | -0.68271  | -1.03804 – -0.32738 | <0.001  |
| time [7]           | -0.87925  | -1.28130 – -0.47720 | <0.001  |
| time [8]           | -1.07826  | -1.46238 – -0.69413 | <0.001  |
| time [9]           | -0.79045  | -1.16223 – -0.41868 | <0.001  |
| time [10]          | -0.84514  | -1.09551 – -0.59478 | <0.001  |
| pp lwi × time [1]  | -0.00091  | -0.00170 – -0.00013 | 0.022   |
| pp lwi × time [2]  | -0.00112  | -0.00193 – -0.00032 | 0.006   |
| pp lwi × time [3]  | -0.0009   | -0.00171 – -0.00009 | 0.029   |
| pp lwi × time [4]  | -0.00007  | -0.00085 – 0.00072  | 0.864   |
| pp lwi × time [5]  | 0.00011   | -0.00068 – 0.00091  | 0.785   |
| pp lwi × time [6]  | -0.00004  | -0.00081 – 0.00072  | 0.91    |
| pp lwi × time [7]  | 0.00062   | -0.00025 – 0.00148  | 0.16    |
| pp lwi × time [8]  | 0.00129   | 0.00046 – 0.00213   | 0.002   |
| pp lwi × time [9]  | 0.00056   | -0.00026 – 0.00138  | 0.178   |
| pp lwi × time [10] | 0.00082   | 0.00031 – 0.00133   | 0.002   |

**Table S8: Calibration–validation schemes tested for the November–June precipitation reconstruction model.**

| Scheme                                      | CALIBRATION         |                    |                | VALIDATION         |                   |      |      |      |           |
|---------------------------------------------|---------------------|--------------------|----------------|--------------------|-------------------|------|------|------|-----------|
|                                             | Calibration dataset | Calibration period | Adjusted $R^2$ | Validation dataset | Validation period | r    | RE   | CE   | RMSE (mm) |
| Late FIC calibration – Early CRU validation | FIC                 | 1962–2020          | 0.70           | CRU                | 1902–1961         | 0.71 | 0.44 | 0.45 | 76.21     |
| Late CRU calibration – Early CRU validation | CRU                 | 1962–2022          | 0.69           | CRU                | 1902–1961         | 0.71 | 0.44 | 0.45 | 76.21     |
| Early CRU calibration – Late CRU validation | CRU                 | 1902–1961          | 0.48           | CRU                | 1962–2022         | 0.83 | 0.67 | 0.67 | 53.75     |
| Early FIC calibration – Late FIC validation | FIC                 | 1952–1986          | 0.67           | FIC                | 1987–2020         | 0.84 | 0.68 | 0.68 | 77.60     |

Note: adjusted  $R^2$  = adjusted coefficient of determination; r = Pearson’s correlation coefficient; RE = reduction of error; CE = coefficient of efficiency; RMSE = root-mean-square error.

50

**Table S9: Extreme years identified in the raw and bias-corrected November–June precipitation reconstructions. The table includes all years flagged as extreme by at least one of the three threshold criteria ( $\pm 1.5$  SD, 5th/95th percentiles, SPI categories), indicating which criterion or criteria detected each year, agreement between raw and bias-corrected reconstructions, reconstructed precipitation in both series, and SPI values. Dry years are ordered from lower to higher precipitation and wet years from higher to lower precipitation.**

55

| Extreme type | Year | Detected in both reconstructions? | Method(s)            | Bias-corrected precipitation (mm) | Raw precipitation (mm) | SPI   |
|--------------|------|-----------------------------------|----------------------|-----------------------------------|------------------------|-------|
|              | 1683 | Yes                               | mean-1.5 SD; P5; SPI | 257                               | 273                    | -1.92 |
|              | 1734 | Yes                               | mean-1.5 SD; P5; SPI | 258                               | 275                    | -2.09 |
|              | 2012 | Yes                               | mean-1.5 SD; P5; SPI | 265                               | 287                    | -1.70 |
|              | 1995 | Yes                               | mean-1.5 SD; P5; SPI | 276                               | 303                    | -1.66 |
|              | 2005 | Yes                               | mean-1.5 SD; P5; SPI | 276                               | 304                    | -1.88 |
| Dry          | 1737 | Yes                               | mean-1.5 SD; P5; SPI | 288                               | 322                    | -1.67 |
|              | 1775 | Yes                               | mean-1.5 SD; P5; SPI | 288                               | 322                    | -1.93 |
|              | 1999 | Yes                               | mean-1.5 SD; P5; SPI | 290                               | 325                    | -1.83 |
|              | 1868 | Yes                               | mean-1.5 SD; P5      | 290                               | 325                    | -1.42 |
|              | 1981 | Yes                               | P5; SPI              | 294                               | 331                    | -1.58 |
|              | 1698 | Yes                               | P5; SPI              | 295                               | 334                    | -1.54 |

|       |               |             |                          |     |       |      |
|-------|---------------|-------------|--------------------------|-----|-------|------|
| 1949  | Yes           | P5; SPI     | 296                      | 335 | -1.96 |      |
| 1738  | Yes           | P5          | 298                      | 337 | -1.41 |      |
| 1898  | Yes           | P5; SPI     | 298                      | 338 | -1.56 |      |
| 1767  | Yes           | P5          | 303                      | 346 | -1.30 |      |
| 1718  | Yes           | P5          | 304                      | 348 | -1.47 |      |
| 1844  | Yes           | P5          | 305                      | 349 | -1.26 |      |
| 1665  | Yes           | P5          | 312                      | 360 | -1.32 |      |
| 1833  | Yes           | P5          | 315                      | 364 | -1.28 |      |
| 1803  | No (raw only) | mean-1.5 SD | 316                      | 366 | -1.14 |      |
| 1687  | No (raw only) | SPI         | 318                      | 369 | -1.44 |      |
| 1699  | No (raw only) | SPI         | 319                      | 370 | -1.43 |      |
| 1744  | No (raw only) | SPI         | 320                      | 372 | -1.46 |      |
| 1828  | No (raw only) | SPI         | 324                      | 377 | -1.42 |      |
| 1811  | No (raw only) | SPI         | 327                      | 383 | -1.38 |      |
| 1896  | No (raw only) | SPI         | 329                      | 385 | -1.40 |      |
| 1757  | Yes           | SPI         | 329                      | 385 | -1.50 |      |
| 1824  | No (raw only) | SPI         | 329                      | 386 | -1.39 |      |
| <hr/> |               |             |                          |     |       |      |
|       | 1684          | Yes         | mean+1.5 SD; P95;<br>SPI | 838 | 857   | 3.01 |
|       | 1784          | Yes         | mean+1.5 SD; P95;<br>SPI | 771 | 804   | 2.19 |
|       | 1988          | Yes         | mean+1.5 SD; P95;<br>SPI | 754 | 791   | 2.10 |
|       | 1708          | Yes         | mean+1.5 SD; P95;<br>SPI | 750 | 788   | 2.41 |
|       | 1966          | Yes         | mean+1.5 SD; P95;<br>SPI | 748 | 786   | 2.58 |
|       | 1930          | Yes         | mean+1.5 SD; P95;<br>SPI | 734 | 775   | 2.48 |
| Wet   | 1977          | Yes         | mean+1.5 SD; P95;<br>SPI | 711 | 757   | 2.84 |
|       | 1692          | Yes         | mean+1.5 SD; P95;<br>SPI | 711 | 757   | 2.16 |
|       | 1800          | Yes         | mean+1.5 SD; P95;<br>SPI | 676 | 730   | 1.90 |
|       | 1795          | Yes         | mean+1.5 SD; P95;<br>SPI | 674 | 728   | 2.19 |
|       | 1736          | Yes         | mean+1.5 SD; P95         | 664 | 721   | 1.56 |
|       | 1799          | Yes         | mean+1.5 SD; P95;<br>SPI | 657 | 715   | 2.00 |
|       | 1848          | Yes         | mean+1.5 SD; P95         | 629 | 693   | 1.53 |
|       | 2021          | Yes         | mean+1.5 SD; P95;<br>SPI | 628 | 692   | 1.68 |
| <hr/> |               |             |                          |     |       |      |

|      |                             |                          |     |     |      |
|------|-----------------------------|--------------------------|-----|-----|------|
| 1814 | Yes                         | mean+1.5 SD; P95;<br>SPI | 626 | 690 | 2.15 |
| 1735 | Yes                         | mean+1.5 SD; P95;<br>SPI | 624 | 689 | 1.78 |
| 1763 | Yes                         | mean+1.5 SD; P95         | 605 | 674 | 1.56 |
| 1731 | Yes                         | mean+1.5 SD; P95         | 603 | 673 | 1.66 |
| 1670 | Yes                         | mean+1.5 SD; P95;<br>SPI | 601 | 671 | 1.92 |
| 1860 | No (bias-corrected<br>only) | mean+1.5 SD              | 600 | 670 | 1.29 |
| 1721 | No (bias-corrected<br>only) | mean+1.5 SD              | 596 | 667 | 1.40 |
| 1762 | No (bias-corrected<br>only) | mean+1.5 SD              | 596 | 667 | 1.47 |
| 1758 | Yes                         | SPI                      | 594 | 666 | 1.74 |
| 1877 | No (bias-corrected<br>only) | mean+1.5 SD              | 589 | 662 | 1.34 |
| 1985 | No (bias-corrected<br>only) | mean+1.5 SD              | 588 | 660 | 1.32 |
| 1915 | No (bias-corrected<br>only) | mean+1.5 SD              | 586 | 659 | 1.44 |
| 1746 | No (bias-corrected<br>only) | SPI                      | 583 | 657 | 1.64 |
| 1782 | No (bias-corrected<br>only) | SPI                      | 569 | 646 | 1.51 |
| 2013 | No (bias-corrected<br>only) | SPI                      | 568 | 646 | 1.59 |
| 1969 | No (bias-corrected<br>only) | SPI                      | 539 | 622 | 1.68 |
| 1861 | No (bias-corrected<br>only) | SPI                      | 535 | 619 | 1.64 |
| 1657 | No (bias-corrected<br>only) | SPI                      | 528 | 613 | 1.56 |

**Table S10: Wet and dry periods identified in the bias-corrected November–June precipitation reconstruction (1649–2023) for northcentral Spain. Bold font indicates the pre-instrumental period.**

| Period | Start year  | End year    | Mean precipitation (mm) | Duration (years) |
|--------|-------------|-------------|-------------------------|------------------|
|        | <b>1702</b> | <b>1712</b> | 456                     | <b>11</b>        |
|        | <b>1719</b> | <b>1739</b> | 465                     | <b>21</b>        |
|        | <b>1756</b> | <b>1769</b> | 474                     | <b>14</b>        |
| Wet    | <b>1793</b> | <b>1804</b> | 461                     | <b>12</b>        |
|        | <b>1806</b> | <b>1818</b> | 455                     | <b>13</b>        |
|        | <b>1855</b> | <b>1864</b> | 452                     | <b>10</b>        |
|        | 1924        | 1938        | 460                     | 15               |

|     |             |             |     |           |
|-----|-------------|-------------|-----|-----------|
|     | 1953        | 1970        | 478 | 18        |
|     | 1971        | 1981        | 450 | 11        |
|     | <b>1652</b> | <b>1669</b> | 400 | <b>18</b> |
|     | <b>1739</b> | <b>1756</b> | 419 | <b>18</b> |
|     | <b>1769</b> | <b>1778</b> | 423 | <b>10</b> |
| Dry | <b>1818</b> | <b>1842</b> | 412 | <b>25</b> |
|     | <b>1864</b> | <b>1879</b> | 421 | <b>16</b> |
|     | <b>1881</b> | <b>1897</b> | 434 | <b>17</b> |
|     | 1938        | 1949        | 412 | 12        |
|     | 2005        | 2015        | 424 | 11        |

60 Table S11: Correspondence between extreme dry years in the bias-corrected November–June precipitation reconstruction (1649–2023) for northcentral Spain and historical documentary records. The table includes all years identified as dry extremes by at least one of the three threshold criteria ( $\pm 1.5$  SD, 5th/95th percentiles, SPI categories). Bold font indicates the pre-instrumental period.

| Extreme dry year | Documentary record                                                                                                                                                                                                                                                                                                                                 |
|------------------|----------------------------------------------------------------------------------------------------------------------------------------------------------------------------------------------------------------------------------------------------------------------------------------------------------------------------------------------------|
| 1665             | Although no rogation record was found for 1665 itself, the marked precipitation decline in the reconstruction and the occurrence of documented drought-related rogations in nearby Valladolid and Zamora in 1664 and 1666 suggest that 1665 formed part of a short regional drought episode (Bellido Blanco, 2017; Domínguez-Castro et al., 2010). |
| 1683             | <i>Pro pluvia</i> rogation in Valladolid performed in April (Bellido Blanco, 2017); Historical drought affecting most of peninsular Spain (Centro de Estudios Hidrográficos, 2013).                                                                                                                                                                |
| 1698             | <i>Pro pluvia</i> rogation in Valladolid performed in May (Bellido Blanco, 2017); <i>Pro pluvia</i> rogation in Zamora performed in spring (Domínguez-Castro et al., 2010); Historical drought affecting most of peninsular Spain (Centro de Estudios Hidrográficos, 2013).                                                                        |
| 1718             | <i>Pro pluvia</i> rogation in Tordesillas performed in May (Bellido Blanco, 2017); Historical drought affecting Castilla, Aragón-Monegros, Levante, Urgel, the Segura basin, and the southern half of the Iberian Peninsula (Centro de Estudios Hidrográficos, 2013).                                                                              |
| 1734             | <i>Pro pluvia</i> rogation in Valladolid performed in May (Bellido Blanco, 2017); Historical drought affecting Castile, Aragon, and Andalusia (Centro de Estudios Hidrográficos, 2013).                                                                                                                                                            |
| 1737             | <i>Pro pluvia</i> rogation in Valladolid performed in April (Bellido Blanco, 2017); <i>Pro pluvia</i> rogation in Zamora performed in winter (Domínguez-Castro et al., 2010); Historical drought affecting most of peninsular Spain (Centro de Estudios Hidrográficos, 2013).                                                                      |
| 1738             | Two <i>pro pluvia</i> rogations in Valladolid performed in May (Bellido Blanco, 2017); One <i>pro pluvia</i> rogation in Zamora performed in winter and another one in spring (Domínguez-Castro et al., 2010); Historical drought affecting most of peninsular Spain (Centro de Estudios Hidrográficos, 2013).                                     |
| 1757             | <i>Pro pluvia</i> rogation in Zamora performed in spring (Domínguez-Castro et al., 2012); Historical drought affecting the Meseta and Levante (Centro de Estudios Hidrográficos, 2013).                                                                                                                                                            |
| 1767             | Three <i>pro pluvia</i> rogations in Valladolid and one in Cuéllar all performed in May (Bellido Blanco, 2017); <i>Pro pluvia</i> rogation in Zamora performed in spring (Domínguez-Castro et al., 2012); Historical drought affecting Castilla and Aragón (Centro de Estudios Hidrográficos, 2013).                                               |

---

|      |                                                                                                                                                                                                                                                                   |
|------|-------------------------------------------------------------------------------------------------------------------------------------------------------------------------------------------------------------------------------------------------------------------|
| 1775 | Three <i>pro pluvia</i> rogations in Valladolid performed in May (Bellido Blanco, 2017); <i>Pro pluvia</i> rogation in Zamora performed in spring (Domínguez-Castro et al., 2012); Historical drought affecting Castile (Centro de Estudios Hidrográficos, 2013). |
| 1833 | <i>Pro pluvia</i> rogation in Zamora performed in spring (Domínguez-Castro et al., 2012).                                                                                                                                                                         |
| 1844 | <i>Pro pluvia</i> rogation in Valladolid performed in April (Bellido Blanco, 2017).                                                                                                                                                                               |
| 1868 | Two <i>pro pluvia</i> rogations in Valladolid performed in April (Bellido Blanco, 2017); Historical drought affecting most of peninsular Spain (Centro de Estudios Hidrográficos, 2013).                                                                          |
| 1898 | Historical drought affecting most of peninsular Spain (Centro de Estudios Hidrográficos, 2013).                                                                                                                                                                   |
| 1949 | Spanish Drought Catalogue (Trullenque-Blanco et al., 2024).                                                                                                                                                                                                       |
| 1981 | Spanish Drought Catalogue (Trullenque-Blanco et al., 2024).                                                                                                                                                                                                       |
| 1995 | Spanish Drought Catalogue (Trullenque-Blanco et al., 2024).                                                                                                                                                                                                       |
| 1999 | Spanish Drought Catalogue (Trullenque-Blanco et al., 2024).                                                                                                                                                                                                       |
| 2005 | Spanish Drought Catalogue (Trullenque-Blanco et al., 2024).                                                                                                                                                                                                       |
| 2012 | Spanish Drought Catalogue (Trullenque-Blanco et al., 2024).                                                                                                                                                                                                       |

---

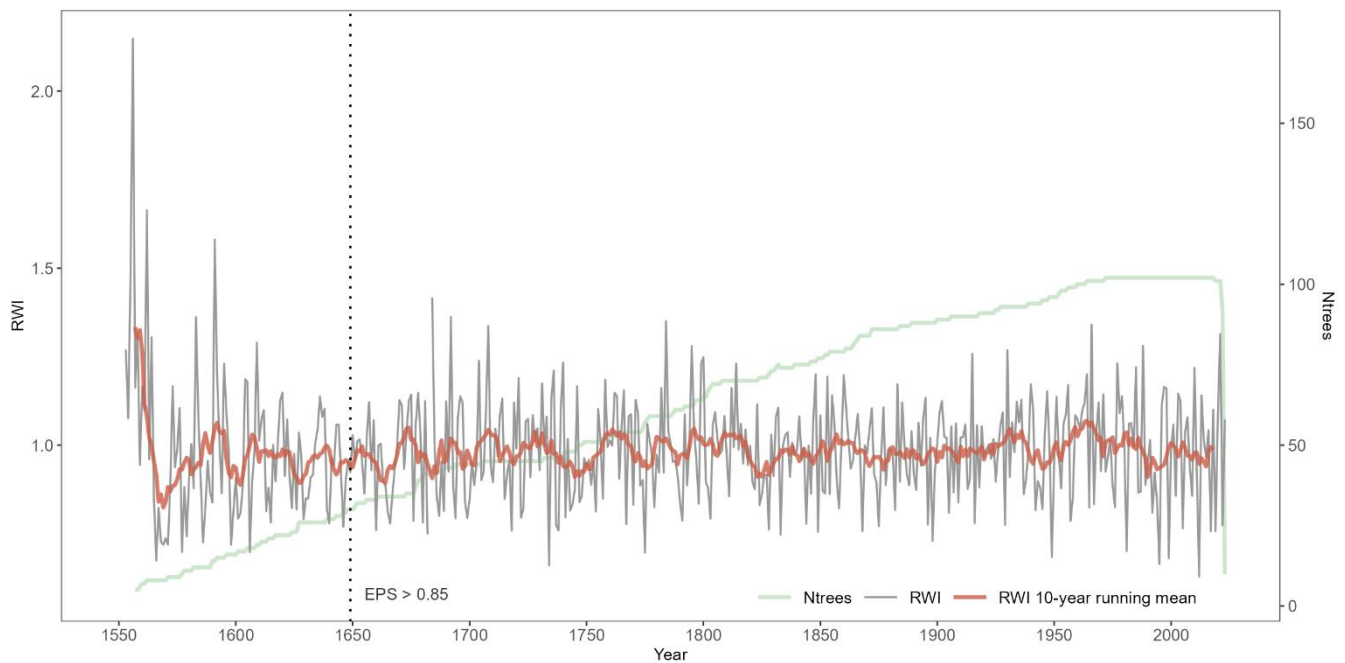

65

**Figure S1: RWI chronology and sample depth.**

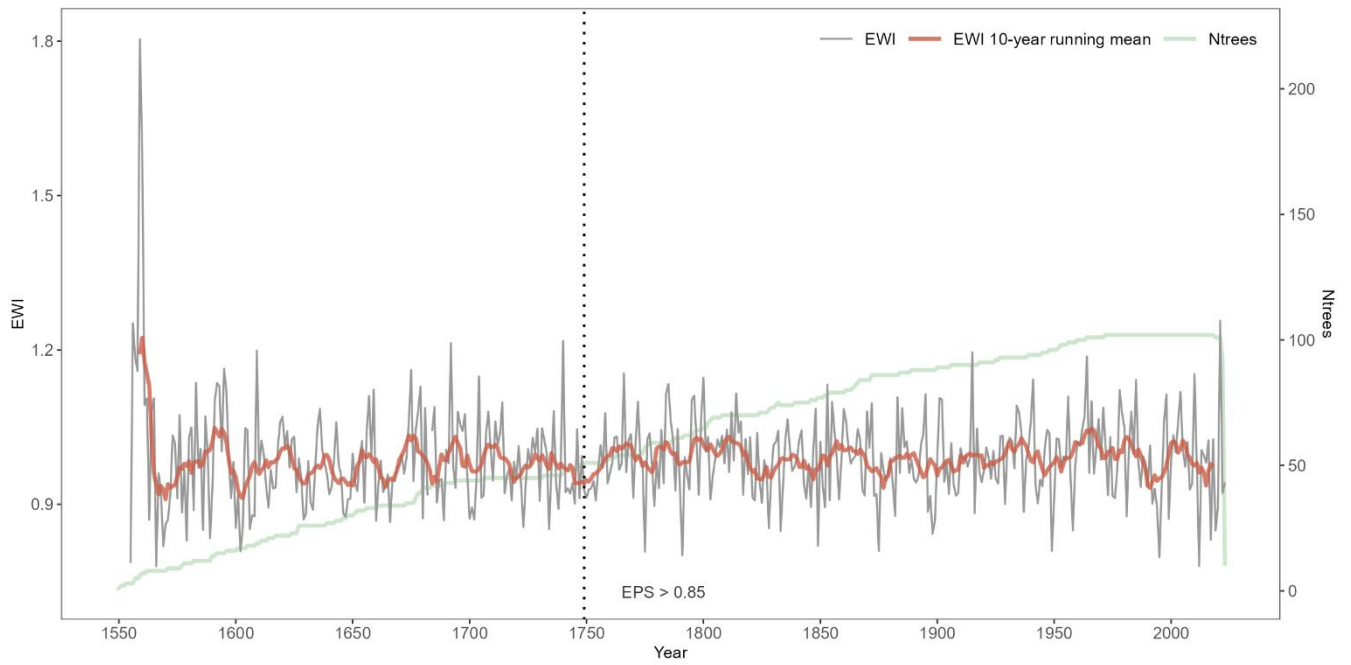

**Figure S2: EWI chronology and sample depth.**

70

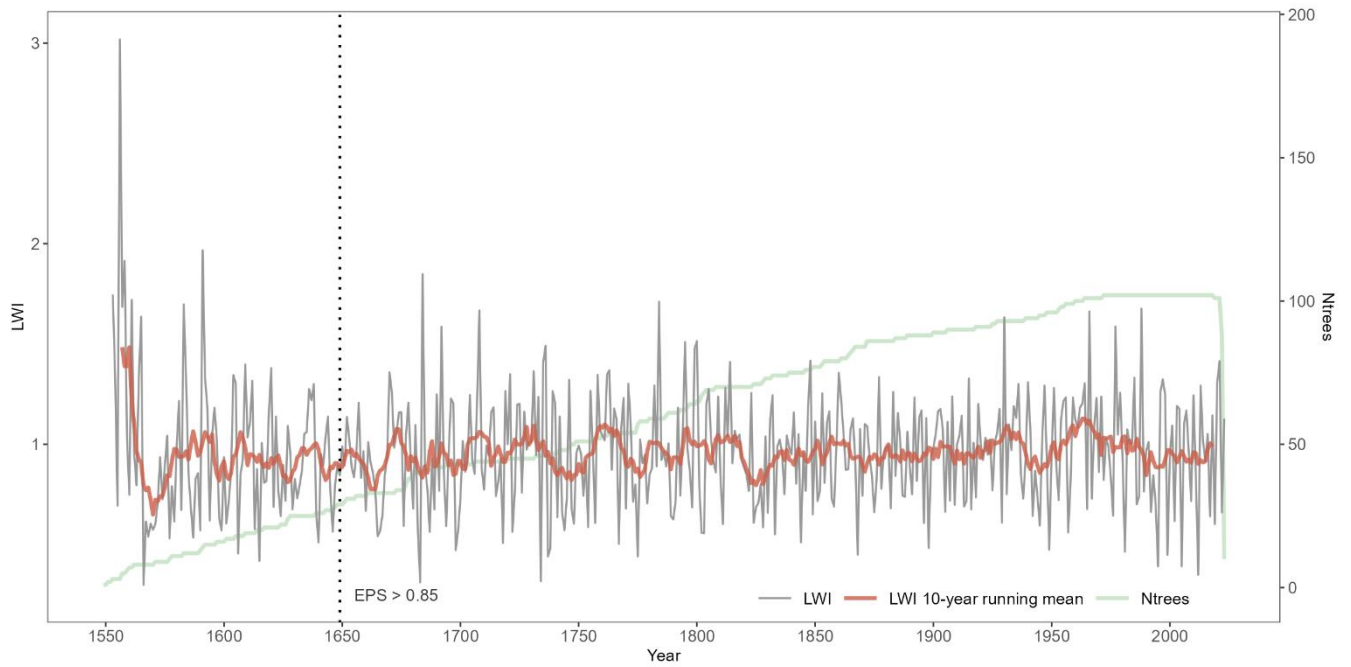

Figure S3: LWI chronology and sample depth.

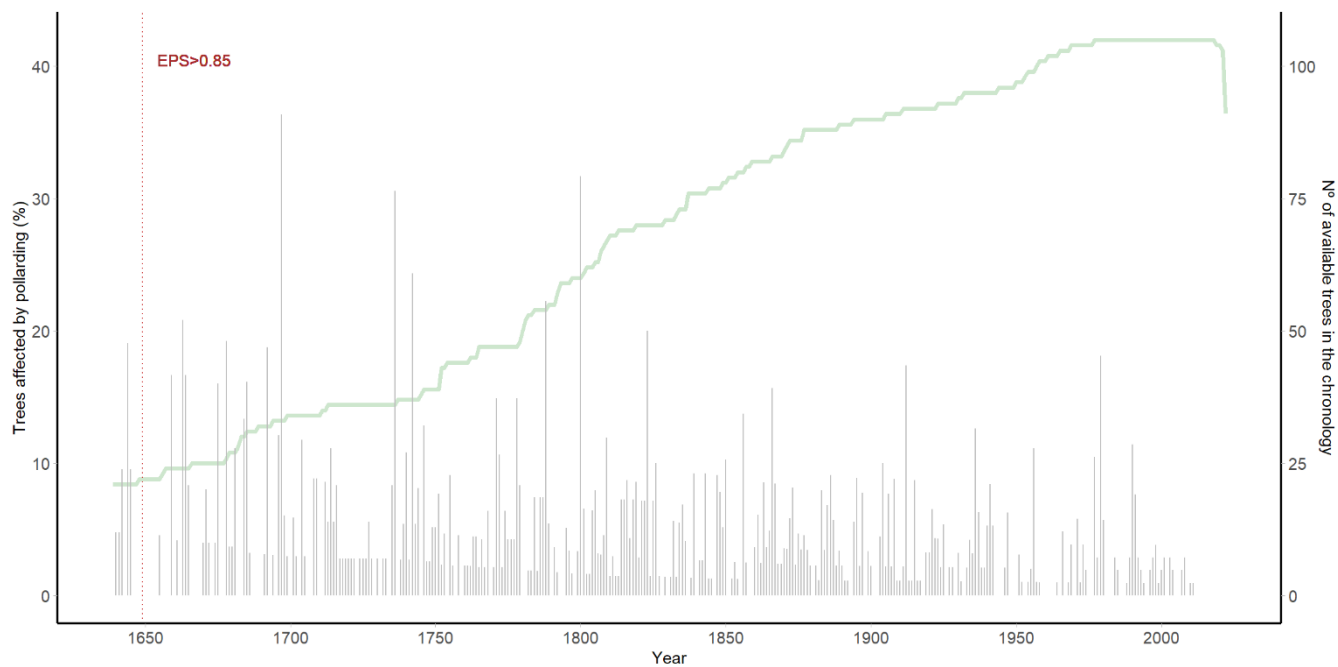

75

Figure S4: Percentage of trees affected by pollarding events each year (grey segments) relative to the number of trees available in the chronology at that time (green line), based on Sanmiguel-Vallelado et al. (2024).

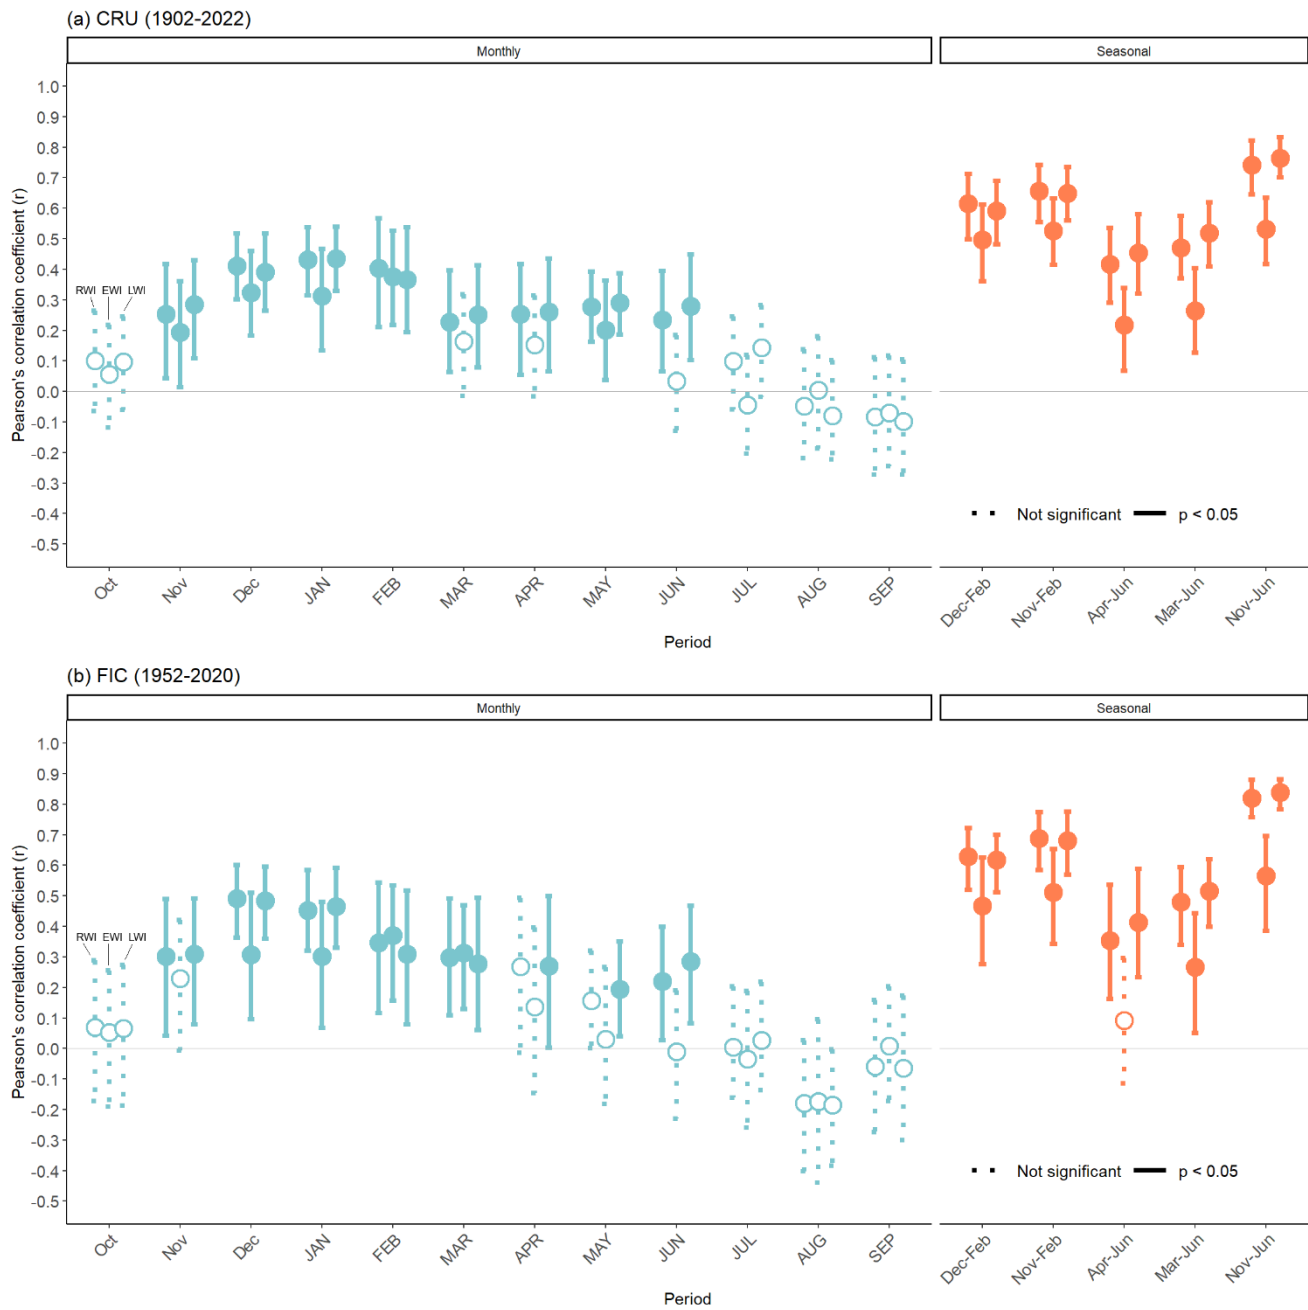

80 **Figure S5: Monthly and seasonal Pearson's correlation coefficients between site chronologies (RWI, EWl, and LWl) and (a) CRU precipitation (1902–2022) or (b) FIC precipitation (1952–2020). Months in lowercase refer to the previous year, whereas months in uppercase refer to the current year.**

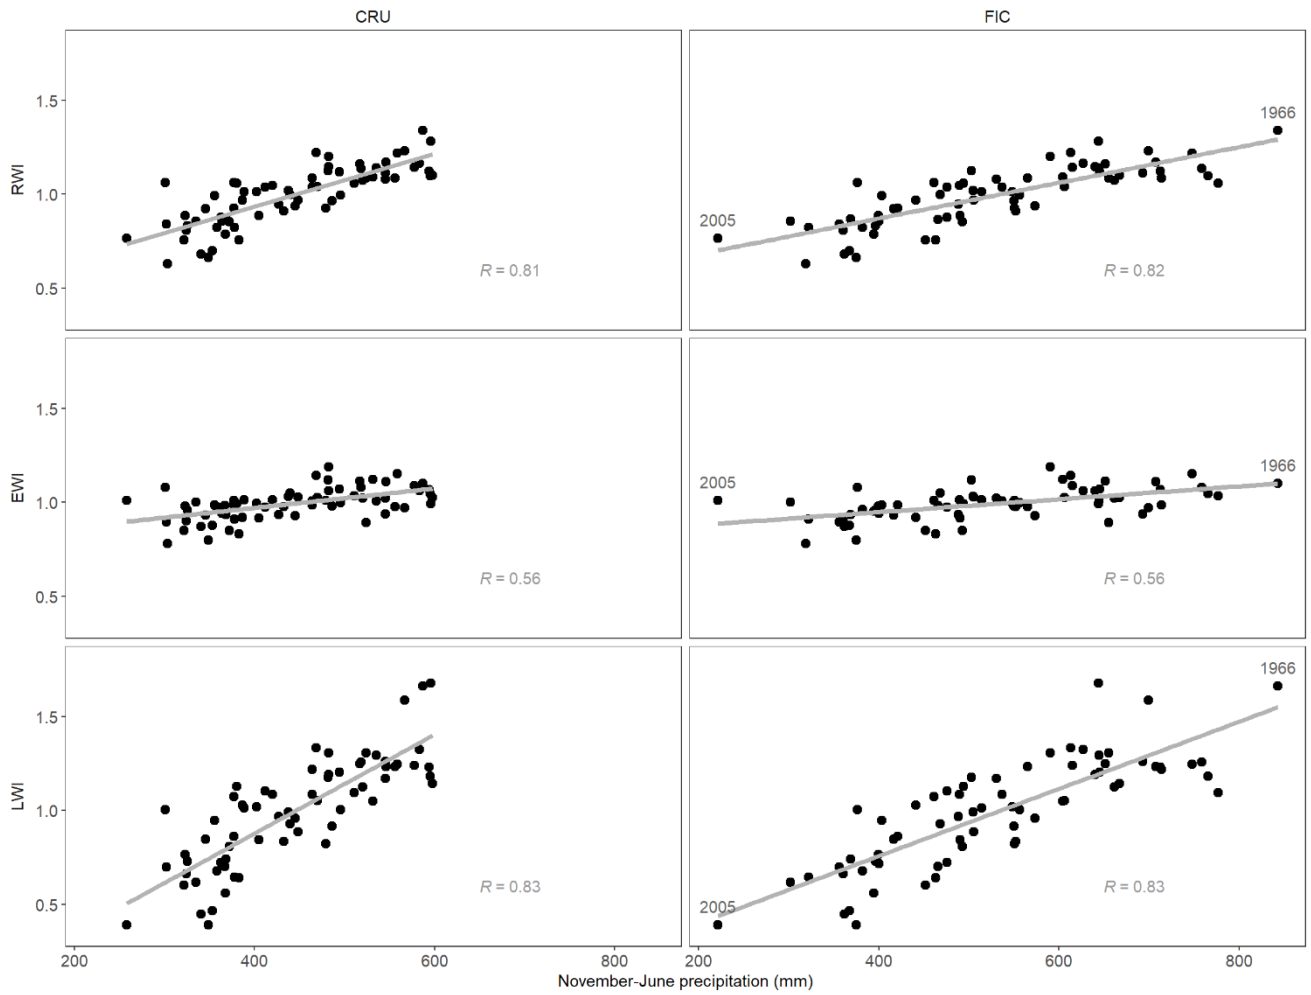

85 **Figure S6:** Scatterplots showing the relationship between November–June precipitation and the site chronologies for RWI (top), EWI (middle), and LWI (bottom). Left panels use CRU precipitation data; right panels use FIC precipitation data. All correlations were computed over the common period covered by both datasets (1952–2020).

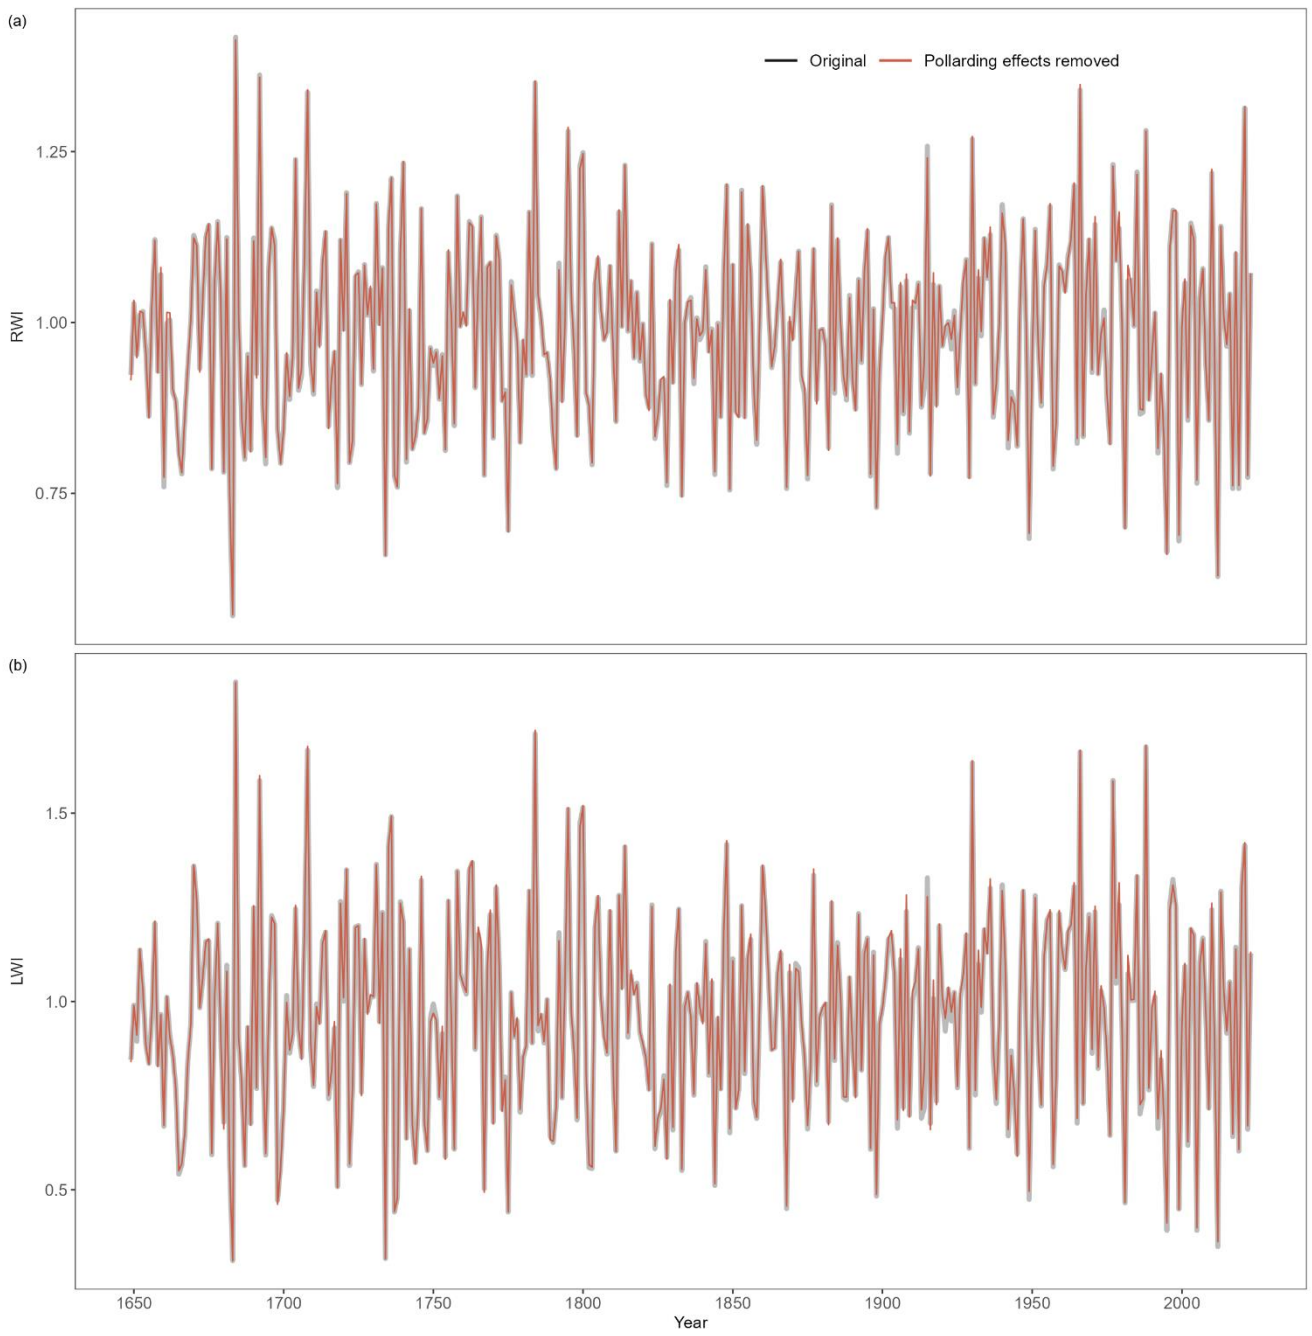

90 **Figure S7: Comparison of RWI (a) and LWI (b) site chronologies before and after removing the effects of pollarding.**

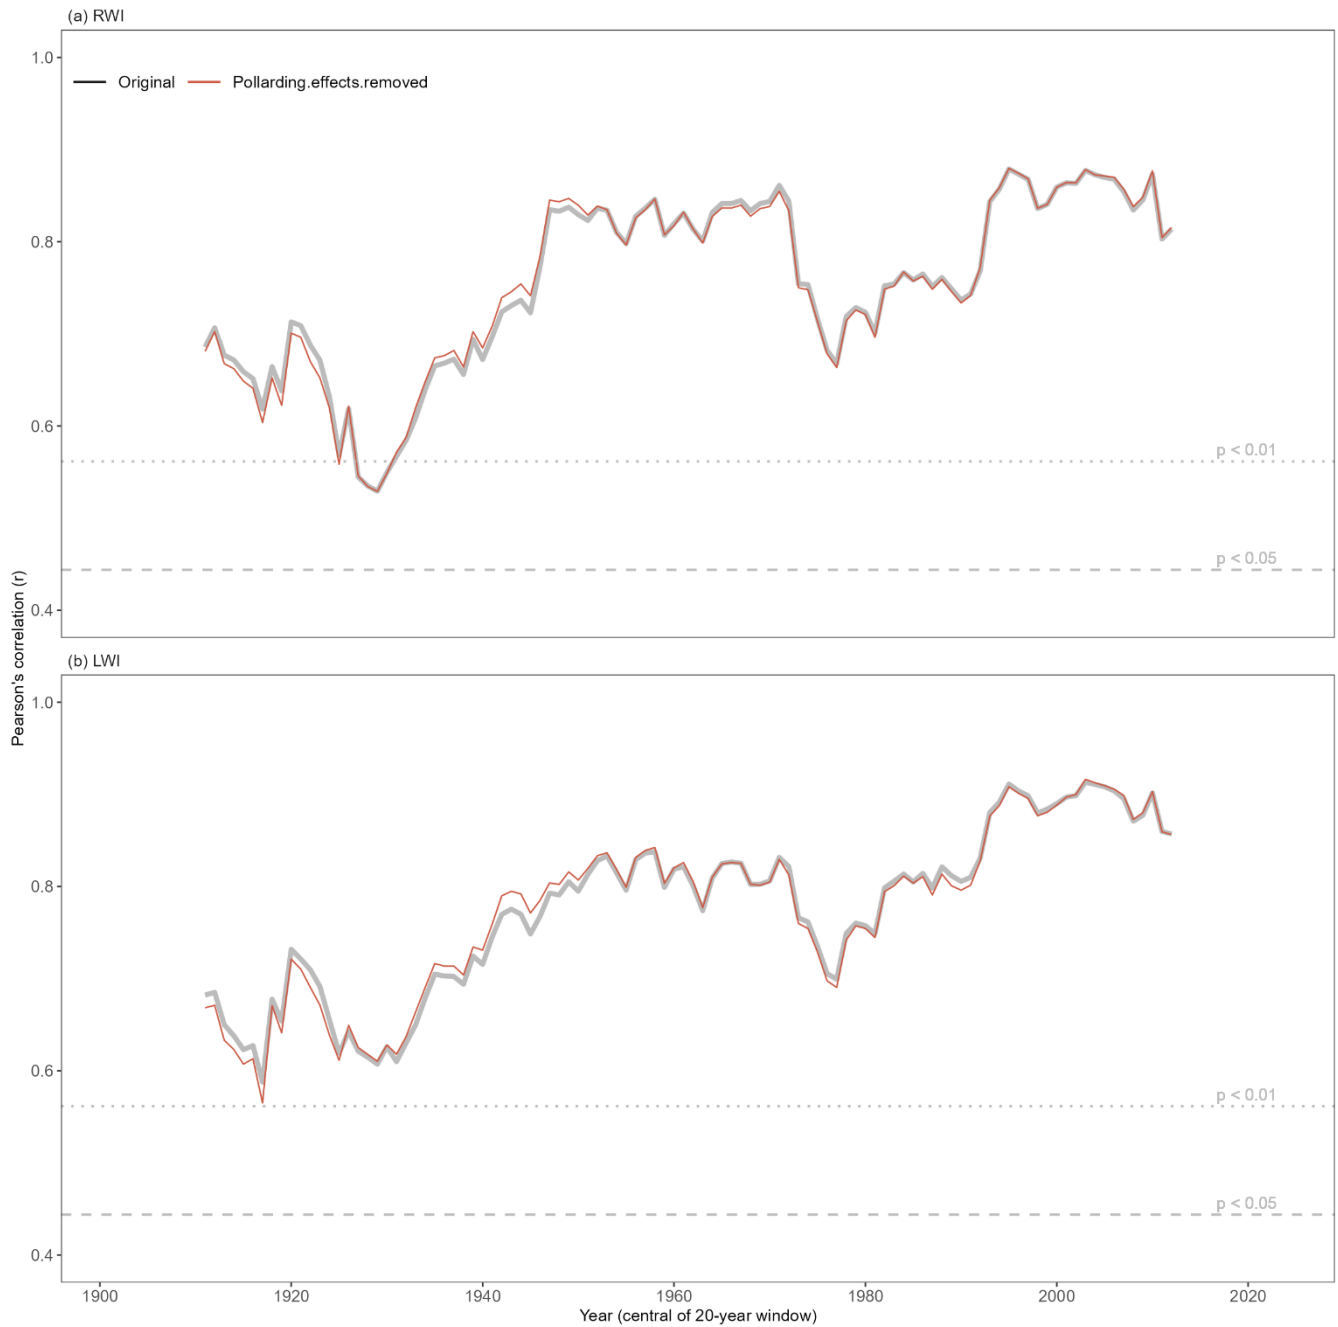

95 **Figure S8: Stability of the dendroclimatic relationship between November–June precipitation and site chronologies before and after removing the effects of pollarding. Precipitation data source: CRU (1902–2022). Panels show the RWI (a) and LWI (b) chronologies. Pearson’s  $r$  was calculated using a 20-year moving window.**

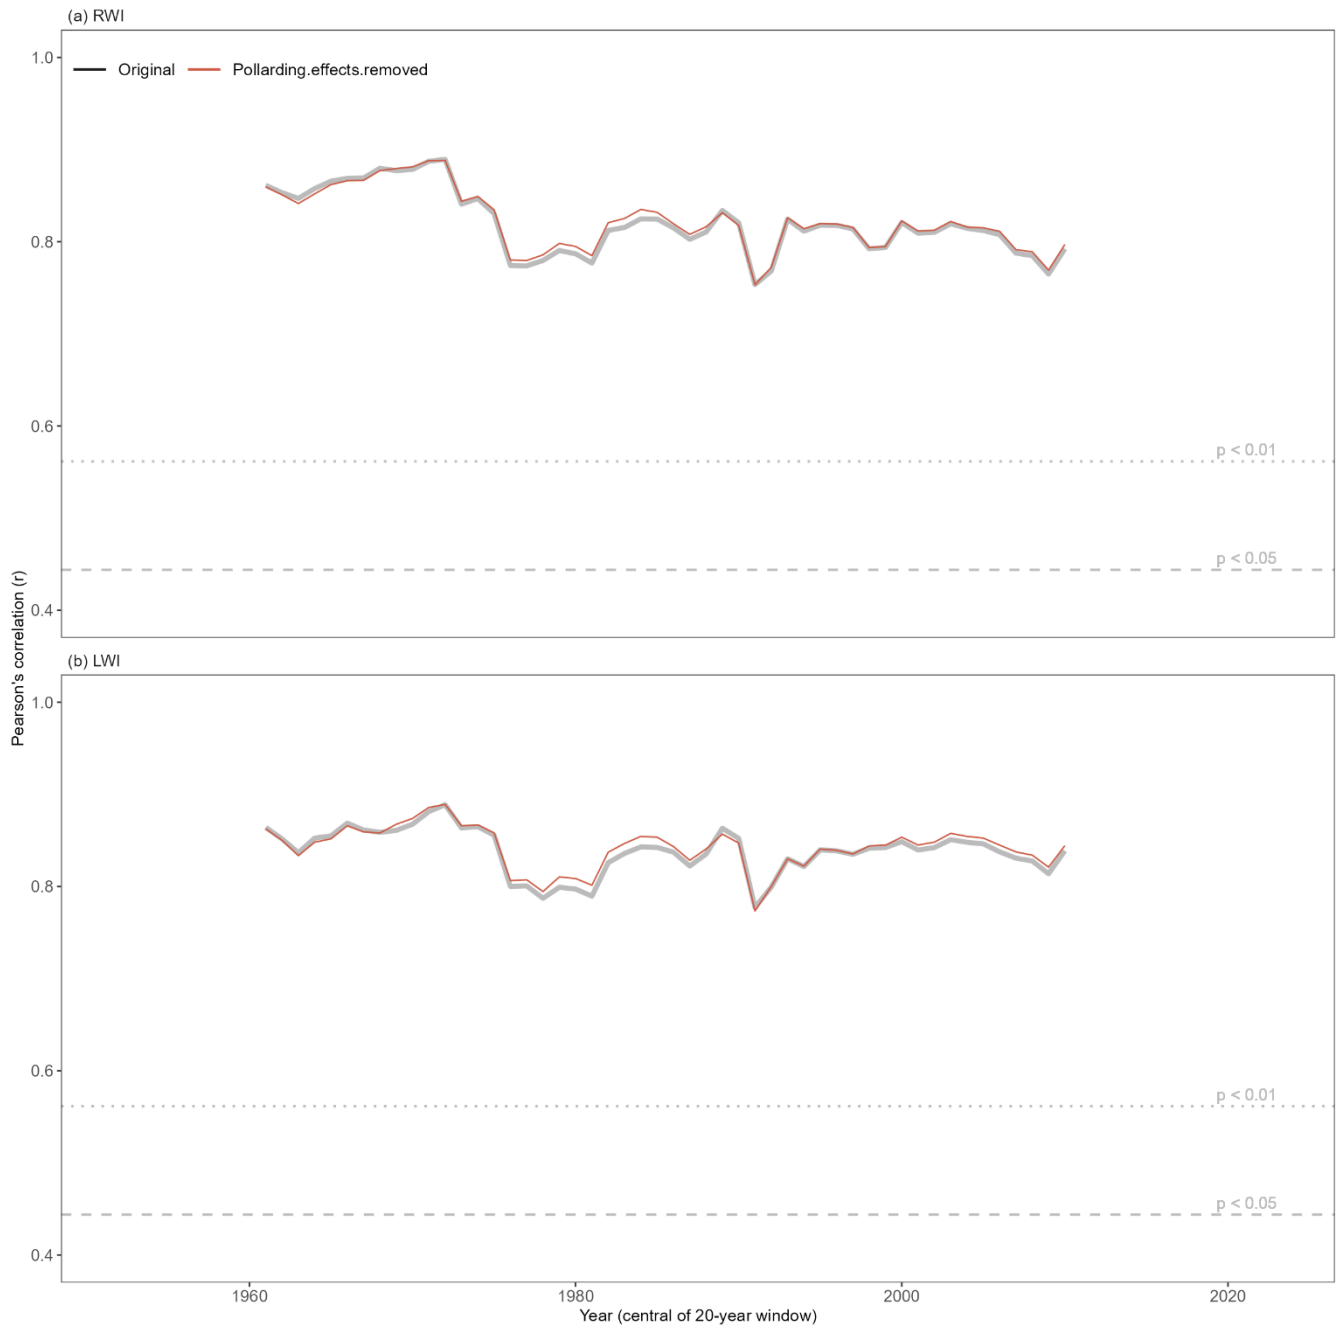

100 **Figure S9: Stability of the dendroclimatic relationship between November–June precipitation and site chronologies before and after removing the effects of pollarding. Precipitation data source: FIC (1952–2020). Panels show the RWI (a) and LWI (b) chronologies. Pearson’s  $r$  was calculated using a 20-year moving window.**

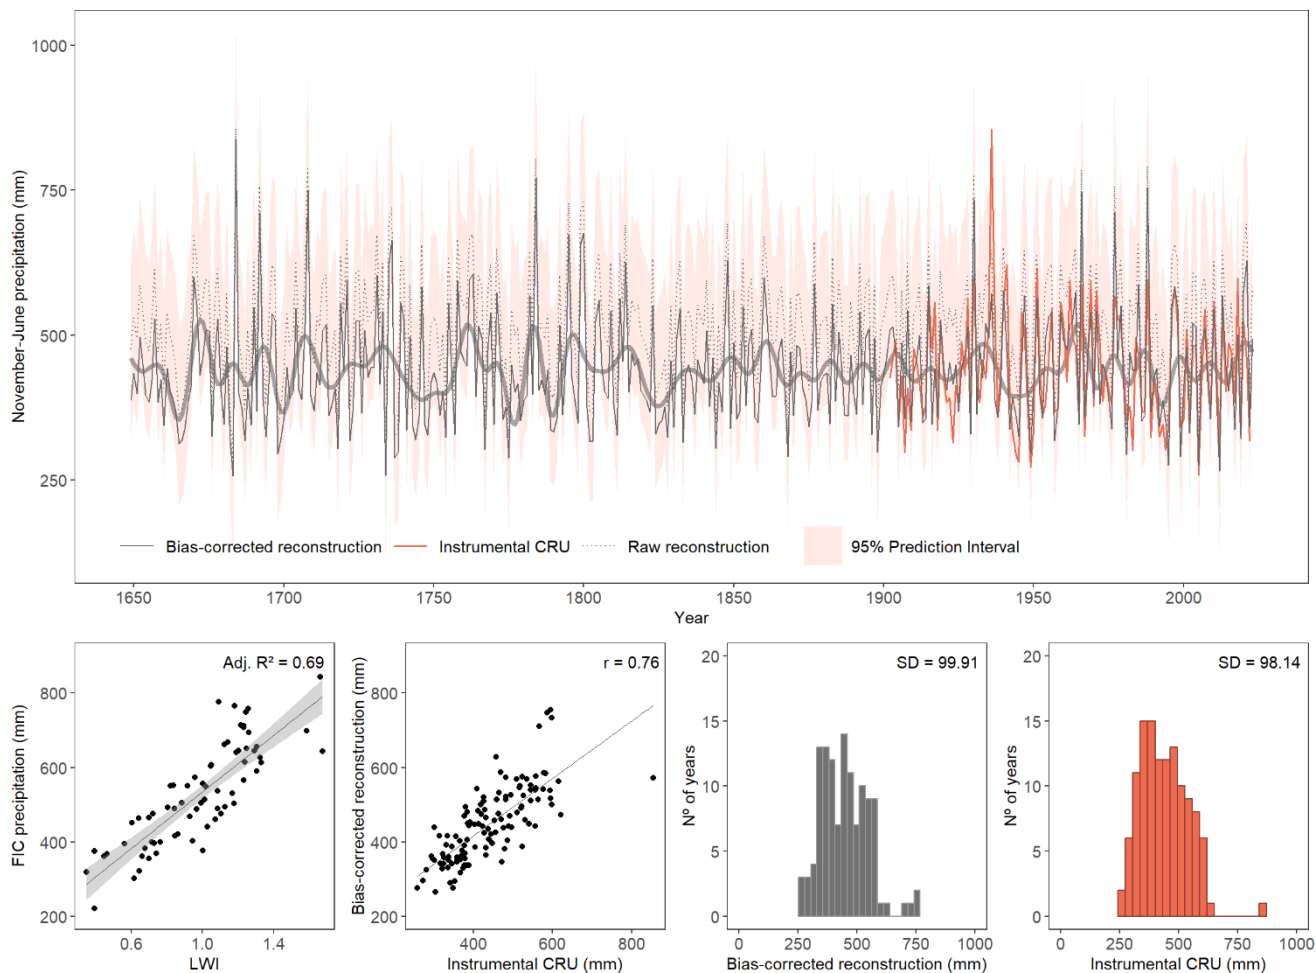

105

**Figure S10: (a) Reconstructed November–June precipitation from 1649 to 2023 derived from pollarded oak LWI data in northcentral Spain. The grey curve shows interannual variability; the shaded area represents the 95% prediction interval of the final calibration model using the full FIC precipitation series (1952–2020). A band-pass filter was applied to isolate low-frequency variability by retaining periodicities between 10 and 100 years (thick line). The reconstruction is compared with the full CRU precipitation series (1902–2022; orange line) to assess its consistency (see Fig. 5 for the split calibration–validation approach). (b) Scatterplot with linear regression between the LWI chronology and full FIC precipitation (1952–2020; final calibration). (c) Scatterplot showing the relationship between full CRU and the bias-corrected reconstruction (1902–2022). (d–e) Frequency distributions of bias-corrected reconstruction and full CRU precipitation, respectively (1902–2022).**

110

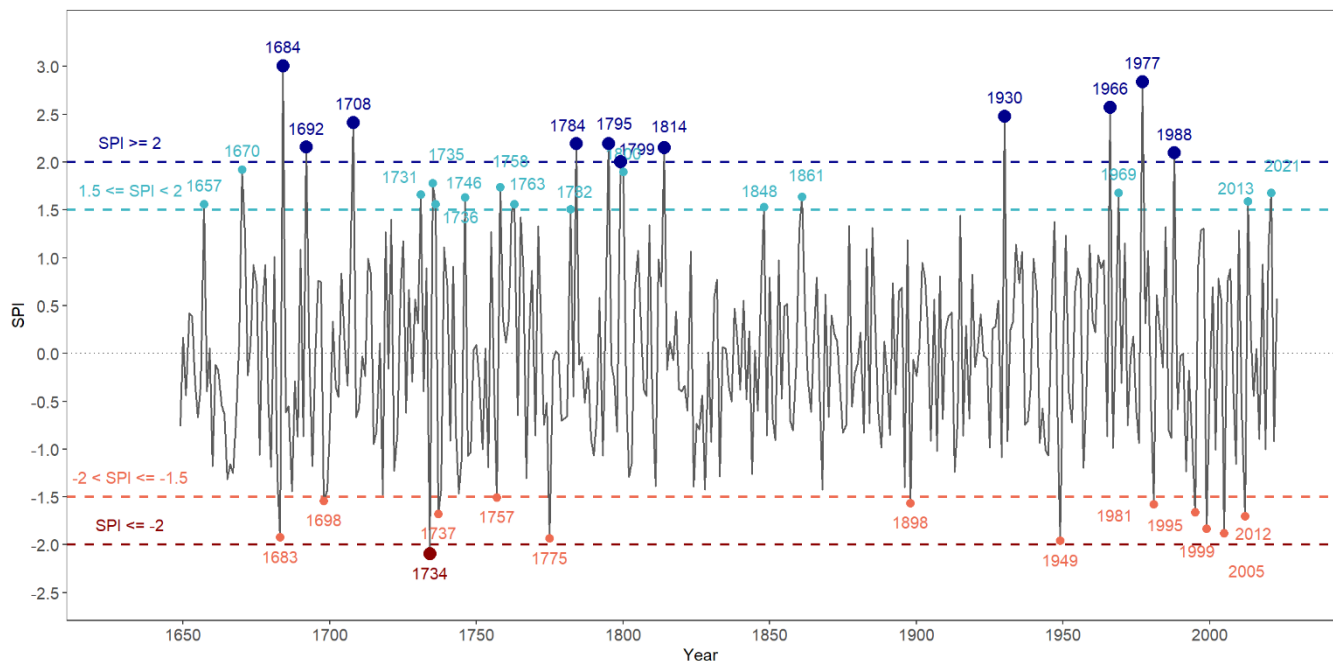

115

**Figure S11: Extreme wet and dry years identified in the bias-corrected November–June precipitation reconstruction (1649–2023) using Standardized Precipitation Index (SPI) categories. See Figure 6 for extremes identified under the  $\pm 1.5$  SD and 5th/95th percentile criteria.**

120

## References

Bellido Blanco, A.: Pidiendo ayuda a los cielos: rogativas en la provincia de Valladolid, Ediciones Universidad de Valladolid, 2017.

125 Centro de Estudios Hidrográficos: Catálogo y Publicación sobre Sequías Históricas, Ministerio de Agricultura, Alimentación y Medio Ambiente. Secretaría de Estado de Medio Ambiente. Dirección General del Agua., Madrid, 2013.

Domínguez-Castro, F., García-Herrera, R., Ribera, P., and Barriandos, M.: A shift in the spatial pattern of Iberian droughts during the 17th century, *Clim. Past*, 6, 553–563, <https://doi.org/10.5194/cp-6-553-2010>, 2010.

130 Domínguez-Castro, F., Ribera, P., García-Herrera, R., Vaquero, J. M., Barriandos, M., Cuadrat, J. M., and Moreno, J. M.: Assessing extreme droughts in Spain during 1750–1850 from rogation ceremonies, *Clim. Past*, 8, 705–722, <https://doi.org/10.5194/cp-8-705-2012>, 2012.

Trullenque-Blanco, V., Beguería, S., Vicente-Serrano, S. M., Peña-Angulo, D., and González-Hidalgo, C.: Catalogue of drought events in peninsular Spanish along 1916–2020 period, *Sci Data*, 11, 703, <https://doi.org/10.1038/s41597-024-03484-w>, 2024.
